# Supplementary material for: White phosphorus as single source of “P” in the synthesis of nickel phosphide
Source: Royal Society of Chemistry journal article supplement (doi:10.1039/b802454e), 2008-01-01
Supplement: b802454e.pdf [file b802454e.pdf]

## Supporting Information

### White Phosphorus as Single Source of “P” in the Synthesis of Metal Phosphide

Sophie Carenco, Irene Resa, Xavier Le Goff, Pascal Le Floch and Nicolas Mézailles

*Laboratoire « Hétéroéléments et Coordination », Ecole Polytechnique,  
CNRS*

*91128 Palaiseau Cédex, France*

*Tel: +33 1 69 33 45 70 ; Fax: +33 1 69 33 39 90*

*E-mail: nicolas.mezailles@polytechnique.edu; pascal.lefloch@polytechnique.edu*

**General Methods.** All reactions were carried out under nitrogen atmosphere using standard air-free techniques.[1] All solvents used were of analytical grade and were dried and degassed before use.[2] Trioctylphosphine oxide (TOPO, Aldrich, 90%), oleylamine (Aldrich, 70%) and tributylphosphine (Aldrich, 97%) were used in the preparation described here without further purification.  $[\text{Ni}(\text{COD})_2]$  was prepared following the literature process.[3] NMR spectra were recorded on a Bruker AMX-300 spectrometer. The  $^1\text{H}$  and  $^{13}\text{C}$  resonances of the solvent were used as the internal standard, and the chemicals shift are reported relative to TMS.

#### Instrumentation

X-ray Diffraction:

Data were collected on a Nonius Kappa CCD diffractometer at 150 K using a Mo K ( $\lambda = 0.71073 \text{ \AA}$ ). X-ray source and a graphite monochromator. Experimental details are described in Table 1. The crystal structure was solved using SIR 97<sup>[4]</sup> and Shelxl-97.<sup>[5]</sup> ORTEP drawings were made using ORTEP III for Windows.<sup>[6]</sup>

Transmission Electron Microscope (TEM):

The transmission electron microscope (Philips CM30) with an accelerating voltage of 300 kV was used for the imaging work. TEM micrographs were processed with a slow scan CCD camera. The images were analysed with Digital Micrograph software. TEM samples were prepared by dropping the hexane solution onto a copper grid (200 mesh) coated with carbon film.

### References

- [1] Shriver, D. F. *The Manipulation of Air-Sensitive Compounds*, 2nd ed.; Wiley Interscience: New York, 1986.
- [2] Perrin, D. D.; Armarego, W. L. F. *Purification of Laboratory Chemicals*, 2nd ed.; Pergamon Press: Oxford, 1980.
- [3] Krysan, D. J.; Mackenzie, P. B. *J. Org. Chem.* **1990**, *55*, 4229.
- [4] Altomare, A.; Burla, M.C.; Camalli, M.; Cascarano, G.; Giacovazzo, C.; Guagliardi, A.; Moliterni, A. G. G.; Polidori, G.; Spagna, R. SIR97, an integrated package computer programs for the solution and refinement of crystal structure using single crystal data .
- [5] Sheldrick, G. M. SHELXL-97, University of Göttingen, Göttingen, Germany, 1997.
- [6] Farrugia, L. J. ORTEP-3 for windows, Department of Chemistry, University of Glasgow.

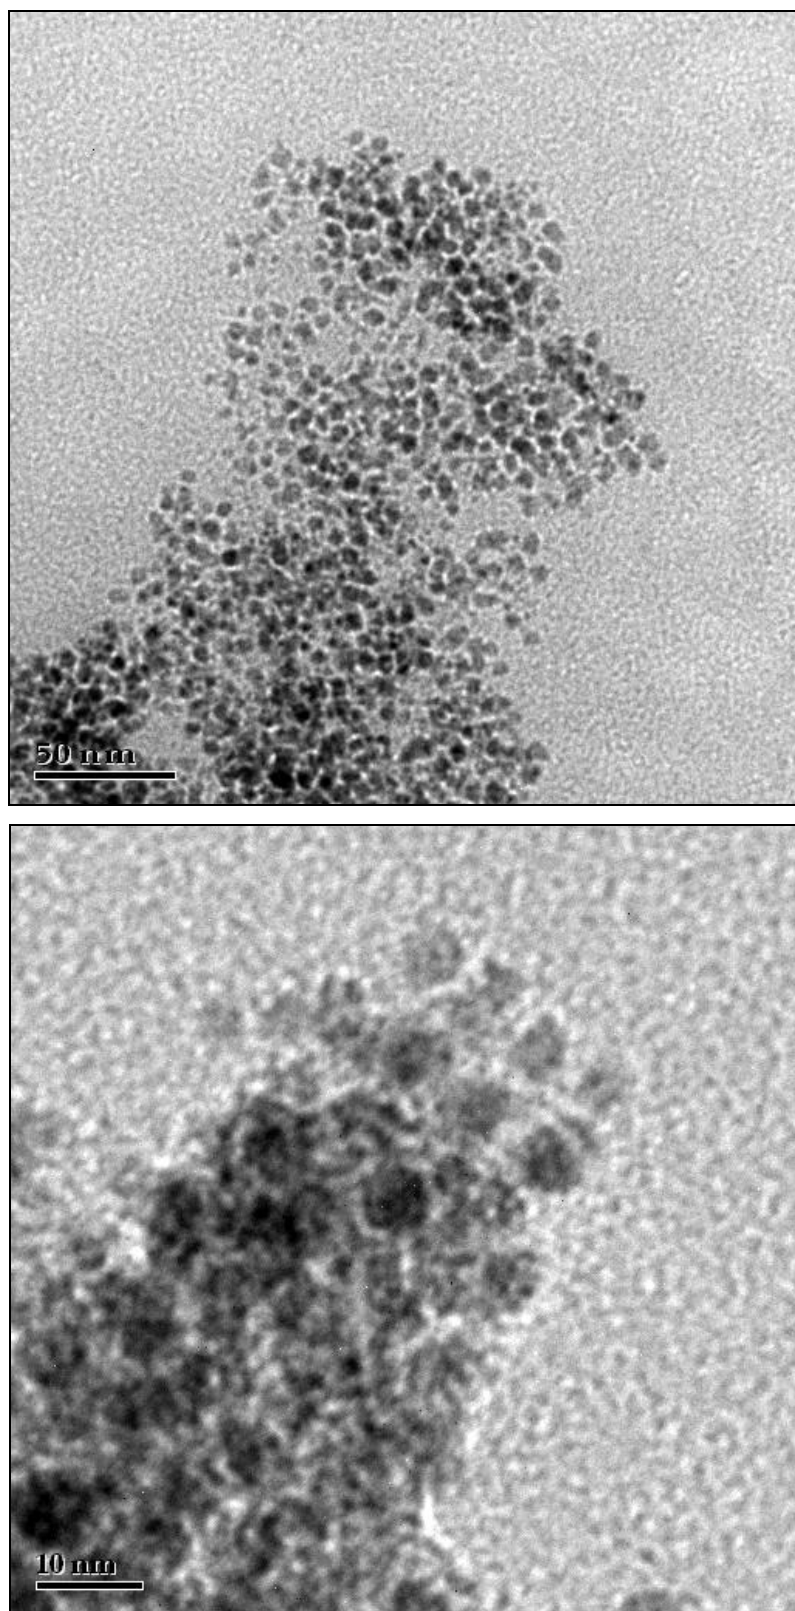

**Figure S1.** TEM micrograph of the Ni<sub>2</sub>P stabilized with TOPO.

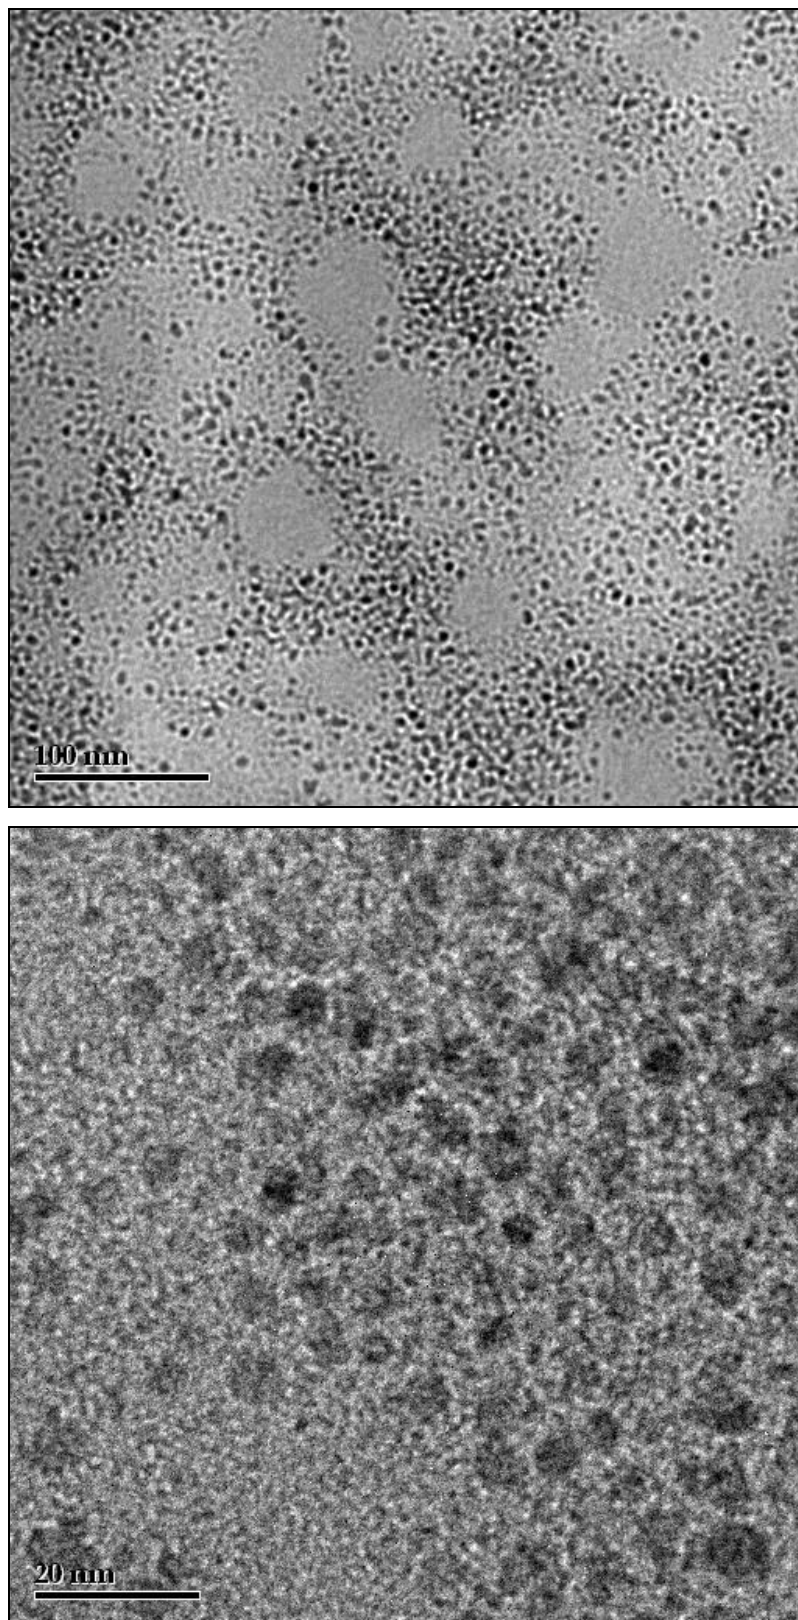

**Figure S2.** TEM micrograph of the Ni<sub>2</sub>P stabilized with oleylamine.

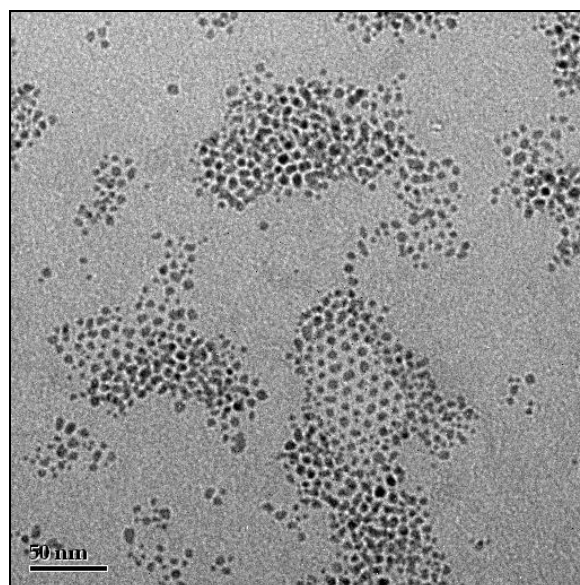

Ni NPs

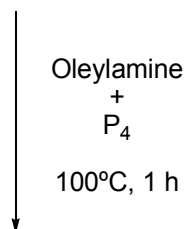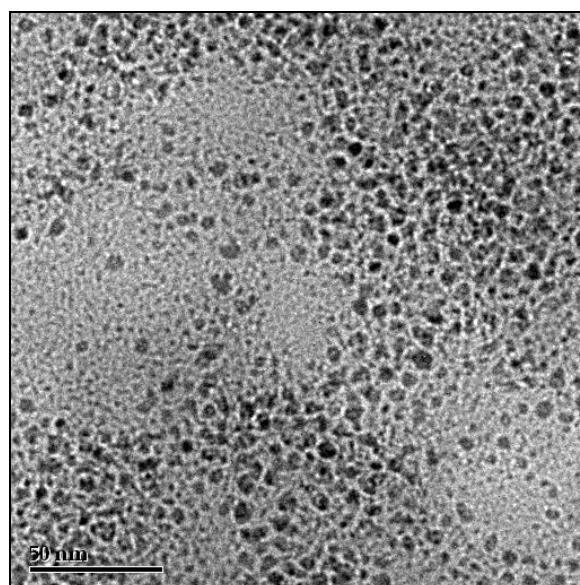

$Ni_2P$  NPs

**Figure S3.** Reaction between Ni NPs and  $P_4$  in oleylamine to yield  $Ni_2P$  NPs.

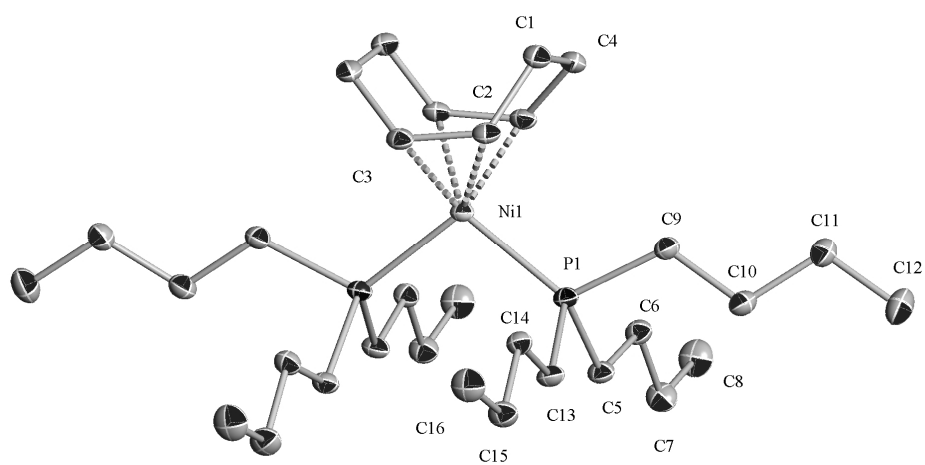

**Figure S4.** ORTEP Plot of [Ni(COD)(PBu<sub>3</sub>)<sub>2</sub>]

Table 1. Crystal data for [Ni(COD)(PBU<sub>3</sub>)<sub>2</sub>].

|                                             |                                                  |
|---------------------------------------------|--------------------------------------------------|
| Compound                                    | [Ni(COD)(PBU <sub>3</sub> ) <sub>2</sub> ]       |
| Molecular formula                           | C <sub>32</sub> H <sub>66</sub> NiP <sub>2</sub> |
| Molecular weight                            | 285.75                                           |
| Crystal habit                               | Yellow Plate                                     |
| Crystal dimensions(mm)                      | 0.30x0.16x0.08                                   |
| Crystal system                              | monoclinic                                       |
| Space group                                 | C2/c                                             |
| <i>a</i> (Å)                                | 21.777(1)                                        |
| <i>b</i> (Å)                                | 8.967(1)                                         |
| <i>c</i> (Å)                                | 17.218(1)                                        |
| $\alpha$ (°)                                | 90.00                                            |
| $\beta$ (°)                                 | 90.769(1)                                        |
| $\gamma$ (°)                                | 90.00                                            |
| <i>V</i> (Å <sup>3</sup> )                  | 3361.9(5)                                        |
| <i>Z</i>                                    | 8                                                |
| <i>d</i> (g·cm <sup>-3</sup> )              | 1.129                                            |
| <i>F</i> (000)                              | 1264                                             |
| $\mu$ (cm <sup>-1</sup> )                   | 0.690                                            |
| Absorption corrections                      | multi-scan ; 0.8197 min, 0.9469 max              |
| Diffractometer                              | KappaCCD                                         |
| X-ray source                                | MoK $\alpha$                                     |
| $\lambda$ (Å)                               | 0.71069                                          |
| Monochromator                               | graphite                                         |
| <i>T</i> (K)                                | 150.0(1)                                         |
| Scan mode                                   | phi and omega scans                              |
| Maximum $\theta$                            | 30.03                                            |
| HKL ranges                                  | -25 30 ; -11 12 ; -20 24                         |
| Reflections measured                        | 15342                                            |
| Unique data                                 | 4911                                             |
| <i>R</i> <sub>int</sub>                     | 0.0274                                           |
| Reflections used                            | 4007                                             |
| Criterion                                   | <i>I</i> > 2 $\sigma$ ( <i>I</i> )               |
| Refinement type                             | Fsqd                                             |
| Hydrogen atoms                              | constr                                           |
| Parameters refined                          | 163                                              |
| Reflections / parameter                     | 24                                               |
| <i>wR</i> <sub>2</sub>                      | 0.0994                                           |
| <i>R</i> <sub>1</sub>                       | 0.0371                                           |
| Weights <i>a</i> , <i>b</i>                 | 0.0474 ; 1.4878                                  |
| GoF                                         | 1.073                                            |
| difference peak / hole (e Å <sup>-3</sup> ) | 0.514(0.057) / -0.469(0.057)                     |

Table 2. Atomic Coordinates ( $\text{\AA} \times 10^4$ ) and equivalent isotropic displacement parameters ( $\text{\AA}^2 \times 10^3$ ) for irg05007

| atom  | x        | y        | z       | U(eq) |
|-------|----------|----------|---------|-------|
| Ni(1) | 0        | 673(1)   | 2500    | 23(1) |
| P(1)  | 415(1)   | 2157(1)  | 1652(1) | 24(1) |
| C(1)  | 158(1)   | -2221(2) | 1646(1) | 33(1) |
| C(2)  | -292(1)  | -932(2)  | 1690(1) | 28(1) |
| C(3)  | -724(1)  | -813(2)  | 2272(1) | 28(1) |
| C(4)  | 773(1)   | -1930(2) | 2076(1) | 32(1) |
| C(5)  | 947(1)   | 3644(2)  | 1973(1) | 29(1) |
| C(6)  | 1546(1)  | 3110(2)  | 2351(1) | 31(1) |
| C(7)  | 1943(1)  | 4390(2)  | 2640(1) | 39(1) |
| C(8)  | 2530(1)  | 3875(3)  | 3045(1) | 50(1) |
| C(9)  | 871(1)   | 1234(2)  | 893(1)  | 29(1) |
| C(10) | 1164(1)  | 2170(2)  | 254(1)  | 33(1) |
| C(11) | 1608(1)  | 1266(2)  | -231(1) | 35(1) |
| C(12) | 1907(1)  | 2190(2)  | -867(1) | 48(1) |
| C(13) | -107(1)  | 3362(2)  | 1073(1) | 29(1) |
| C(14) | -653(1)  | 2604(2)  | 679(1)  | 28(1) |
| C(15) | -1074(1) | 3725(2)  | 273(1)  | 35(1) |
| C(16) | -1641(1) | 3037(2)  | -105(1) | 46(1) |

U(eq) is defined as 1/3 the trace of the  $U_{ij}$  tensor.



Table 3. Bond lengths (Å) and angles (deg) for [Ni(COD)(PBU<sub>3</sub>)<sub>2</sub>]

|                     |           |                     |           |
|---------------------|-----------|---------------------|-----------|
| Ni(1)-C(2)#2        | 2.097(1)  | Ni(1)-C(2)          | 2.097(1)  |
| Ni(1)-C(3)          | 2.097(1)  | Ni(1)-C(3)#2        | 2.097(1)  |
| Ni(1)-P(1)          | 2.1799(4) | Ni(1)-P(1)#2        | 2.1799(4) |
| P(1)-C(5)           | 1.848(2)  | P(1)-C(9)           | 1.849(2)  |
| P(1)-C(13)          | 1.850(2)  | C(1)-C(2)           | 1.518(2)  |
| C(1)-C(4)           | 1.543(2)  | C(1)-H(1A)          | 0.9900    |
| C(1)-H(1B)          | 0.9900    | C(2)-C(3)           | 1.386(2)  |
| C(2)-H(2)           | 0.9500    | C(3)-C(4)#2         | 1.510(2)  |
| C(3)-H(3)           | 0.9500    | C(4)-C(3)#2         | 1.510(2)  |
| C(4)-H(4A)          | 0.9900    | C(4)-H(4B)          | 0.9900    |
| C(5)-C(6)           | 1.526(2)  | C(5)-H(5A)          | 0.9900    |
| C(5)-H(5B)          | 0.9900    | C(6)-C(7)           | 1.518(2)  |
| C(6)-H(6A)          | 0.9900    | C(6)-H(6B)          | 0.9900    |
| C(7)-C(8)           | 1.519(2)  | C(7)-H(7A)          | 0.9900    |
| C(7)-H(7B)          | 0.9900    | C(8)-H(8A)          | 0.9800    |
| C(8)-H(8B)          | 0.9800    | C(8)-H(8C)          | 0.9800    |
| C(9)-C(10)          | 1.530(2)  | C(9)-H(9A)          | 0.9900    |
| C(9)-H(9B)          | 0.9900    | C(10)-C(11)         | 1.521(2)  |
| C(10)-H(10A)        | 0.9900    | C(10)-H(10B)        | 0.9900    |
| C(11)-C(12)         | 1.525(2)  | C(11)-H(11A)        | 0.9900    |
| C(11)-H(11B)        | 0.9900    | C(12)-H(12A)        | 0.9800    |
| C(12)-H(12B)        | 0.9800    | C(12)-H(12C)        | 0.9800    |
| C(13)-C(14)         | 1.521(2)  | C(13)-H(13A)        | 0.9900    |
| C(13)-H(13B)        | 0.9900    | C(14)-C(15)         | 1.523(2)  |
| C(14)-H(14A)        | 0.9900    | C(14)-H(14B)        | 0.9900    |
| C(15)-C(16)         | 1.520(2)  | C(15)-H(15A)        | 0.9900    |
| C(15)-H(15B)        | 0.9900    | C(16)-H(16A)        | 0.9800    |
| C(16)-H(16B)        | 0.9800    | C(16)-H(16C)        | 0.9800    |
|                     |           |                     |           |
| C(2)#2-Ni(1)-C(2)   | 93.32(8)  | C(2)#2-Ni(1)-C(3)   | 84.78(6)  |
| C(2)-Ni(1)-C(3)     | 38.60(6)  | C(2)#2-Ni(1)-C(3)#2 | 38.60(6)  |
| C(2)-Ni(1)-C(3)#2   | 84.78(6)  | C(3)-Ni(1)-C(3)#2   | 101.06(8) |
| C(2)#2-Ni(1)-P(1)   | 137.69(4) | C(2)-Ni(1)-P(1)     | 95.62(4)  |
| C(3)-Ni(1)-P(1)     | 125.39(4) | C(3)#2-Ni(1)-P(1)   | 101.33(4) |
| C(2)#2-Ni(1)-P(1)#2 | 95.62(4)  | C(2)-Ni(1)-P(1)#2   | 137.69(4) |
| C(3)-Ni(1)-P(1)#2   | 101.33(4) | C(3)#2-Ni(1)-P(1)#2 | 125.39(4) |
| P(1)-Ni(1)-P(1)#2   | 104.81(2) | C(5)-P(1)-C(9)      | 101.16(7) |
| C(5)-P(1)-C(13)     | 96.76(7)  | C(9)-P(1)-C(13)     | 102.33(7) |
| C(5)-P(1)-Ni(1)     | 120.26(5) | C(9)-P(1)-Ni(1)     | 115.61(5) |
| C(13)-P(1)-Ni(1)    | 117.40(5) | C(2)-C(1)-C(4)      | 113.9(1)  |
| C(2)-C(1)-H(1A)     | 108.8     | C(4)-C(1)-H(1A)     | 108.8     |
| C(2)-C(1)-H(1B)     | 108.8     | C(4)-C(1)-H(1B)     | 108.8     |
| H(1A)-C(1)-H(1B)    | 107.7     | C(3)-C(2)-C(1)      | 122.6(1)  |
| C(3)-C(2)-Ni(1)     | 70.70(8)  | C(1)-C(2)-Ni(1)     | 111.4(1)  |
| C(3)-C(2)-H(2)      | 118.7     | C(1)-C(2)-H(2)      | 118.7     |
| Ni(1)-C(2)-H(2)     | 88.0      | C(2)-C(3)-C(4)#2    | 122.9(1)  |
| C(2)-C(3)-Ni(1)     | 70.69(8)  | C(4)#2-C(3)-Ni(1)   | 110.1(1)  |
| C(2)-C(3)-H(3)      | 118.6     | C(4)#2-C(3)-H(3)    | 118.6     |
| Ni(1)-C(3)-H(3)     | 89.2      | C(3)#2-C(4)-C(1)    | 113.4(1)  |
| C(3)#2-C(4)-H(4A)   | 108.9     | C(1)-C(4)-H(4A)     | 108.9     |
| C(3)#2-C(4)-H(4B)   | 108.9     | C(1)-C(4)-H(4B)     | 108.9     |
| H(4A)-C(4)-H(4B)    | 107.7     | C(6)-C(5)-P(1)      | 115.5(1)  |
| C(6)-C(5)-H(5A)     | 108.4     | P(1)-C(5)-H(5A)     | 108.4     |
| C(6)-C(5)-H(5B)     | 108.4     | P(1)-C(5)-H(5B)     | 108.4     |
| H(5A)-C(5)-H(5B)    | 107.5     | C(7)-C(6)-C(5)      | 112.5(1)  |
| C(7)-C(6)-H(6A)     | 109.1     | C(5)-C(6)-H(6A)     | 109.1     |
| C(7)-C(6)-H(6B)     | 109.1     | C(5)-C(6)-H(6B)     | 109.1     |
| H(6A)-C(6)-H(6B)    | 107.8     | C(6)-C(7)-C(8)      | 113.1(2)  |
| C(6)-C(7)-H(7A)     | 109.0     | C(8)-C(7)-H(7A)     | 109.0     |
| C(6)-C(7)-H(7B)     | 109.0     | C(8)-C(7)-H(7B)     | 109.0     |
| H(7A)-C(7)-H(7B)    | 107.8     | C(7)-C(8)-H(8A)     | 109.5     |
| C(7)-C(8)-H(8B)     | 109.5     | H(8A)-C(8)-H(8B)    | 109.5     |
| C(7)-C(8)-H(8C)     | 109.5     | H(8A)-C(8)-H(8C)    | 109.5     |
| H(8B)-C(8)-H(8C)    | 109.5     | C(10)-C(9)-P(1)     | 119.7(1)  |
| C(10)-C(9)-H(9A)    | 107.4     | P(1)-C(9)-H(9A)     | 107.4     |

|                     |       |                     |          |
|---------------------|-------|---------------------|----------|
| C(10)-C(9)-H(9B)    | 107.4 | P(1)-C(9)-H(9B)     | 107.4    |
| H(9A)-C(9)-H(9B)    | 106.9 | C(11)-C(10)-C(9)    | 112.1(1) |
| C(11)-C(10)-H(10A)  | 109.2 | C(9)-C(10)-H(10A)   | 109.2    |
| C(11)-C(10)-H(10B)  | 109.2 | C(9)-C(10)-H(10B)   | 109.2    |
| H(10A)-C(10)-H(10B) | 107.9 | C(10)-C(11)-C(12)   | 112.6(2) |
| C(10)-C(11)-H(11A)  | 109.1 | C(12)-C(11)-H(11A)  | 109.1    |
| C(10)-C(11)-H(11B)  | 109.1 | C(12)-C(11)-H(11B)  | 109.1    |
| H(11A)-C(11)-H(11B) | 107.8 | C(11)-C(12)-H(12A)  | 109.5    |
| C(11)-C(12)-H(12B)  | 109.5 | H(12A)-C(12)-H(12B) | 109.5    |
| C(11)-C(12)-H(12C)  | 109.5 | H(12A)-C(12)-H(12C) | 109.5    |
| H(12B)-C(12)-H(12C) | 109.5 | C(14)-C(13)-P(1)    | 116.7(1) |
| C(14)-C(13)-H(13A)  | 108.1 | P(1)-C(13)-H(13A)   | 108.1    |
| C(14)-C(13)-H(13B)  | 108.1 | P(1)-C(13)-H(13B)   | 108.1    |
| H(13A)-C(13)-H(13B) | 107.3 | C(13)-C(14)-C(15)   | 111.8(1) |
| C(13)-C(14)-H(14A)  | 109.3 | C(15)-C(14)-H(14A)  | 109.3    |
| C(13)-C(14)-H(14B)  | 109.3 | C(15)-C(14)-H(14B)  | 109.3    |
| H(14A)-C(14)-H(14B) | 107.9 | C(16)-C(15)-C(14)   | 114.1(2) |
| C(16)-C(15)-H(15A)  | 108.7 | C(14)-C(15)-H(15A)  | 108.7    |
| C(16)-C(15)-H(15B)  | 108.7 | C(14)-C(15)-H(15B)  | 108.7    |
| H(15A)-C(15)-H(15B) | 107.6 | C(15)-C(16)-H(16A)  | 109.5    |
| C(15)-C(16)-H(16B)  | 109.5 | H(16A)-C(16)-H(16B) | 109.5    |
| C(15)-C(16)-H(16C)  | 109.5 | H(16A)-C(16)-H(16C) | 109.5    |
| H(16B)-C(16)-H(16C) | 109.5 |                     |          |

-----  
Estimated standard deviations are given in the parenthesis.

Symmetry operators ::

|                          |                         |                    |
|--------------------------|-------------------------|--------------------|
| 1: x, y, z               | 2: -x, y, -z+1/2        | 3: x+1/2, y+1/2, z |
| 4: -x+1/2, y+1/2, -z+1/2 | 5: -x, -y, -z           | 6: x, -y, z-1/2    |
| 7: -x+1/2, -y+1/2, -z    | 8: x+1/2, -y+1/2, z-1/2 |                    |

Table 4. Anisotropic displacement parameters ( $\text{\AA}^2 \times 10^3$ ) for  
 [Ni(COD)(PBU<sub>3</sub>)<sub>2</sub>]

| atom  | U11   | U22   | U33   | U23   | U13    | U12    |
|-------|-------|-------|-------|-------|--------|--------|
| Ni(1) | 23(1) | 16(1) | 28(1) | 0     | -1(1)  | 0      |
| P(1)  | 25(1) | 18(1) | 30(1) | 1(1)  | -1(1)  | -2(1)  |
| C(1)  | 39(1) | 24(1) | 35(1) | -4(1) | 3(1)   | -1(1)  |
| C(2)  | 32(1) | 19(1) | 33(1) | -2(1) | -3(1)  | -4(1)  |
| C(3)  | 26(1) | 20(1) | 37(1) | -3(1) | -3(1)  | -3(1)  |
| C(4)  | 32(1) | 22(1) | 41(1) | 1(1)  | 5(1)   | 5(1)   |
| C(5)  | 29(1) | 22(1) | 35(1) | -1(1) | -1(1)  | -4(1)  |
| C(6)  | 29(1) | 28(1) | 35(1) | 0(1)  | -1(1)  | -4(1)  |
| C(7)  | 32(1) | 38(1) | 47(1) | -8(1) | -6(1)  | -6(1)  |
| C(8)  | 37(1) | 62(1) | 52(1) | -4(1) | -11(1) | -9(1)  |
| C(9)  | 31(1) | 25(1) | 30(1) | 2(1)  | 2(1)   | -2(1)  |
| C(10) | 39(1) | 29(1) | 32(1) | 3(1)  | 1(1)   | -6(1)  |
| C(11) | 34(1) | 37(1) | 33(1) | 0(1)  | 2(1)   | -6(1)  |
| C(12) | 49(1) | 58(1) | 38(1) | 0(1)  | 8(1)   | -17(1) |
| C(13) | 30(1) | 21(1) | 37(1) | 4(1)  | -2(1)  | -2(1)  |
| C(14) | 29(1) | 26(1) | 30(1) | 2(1)  | 0(1)   | 0(1)   |
| C(15) | 33(1) | 32(1) | 39(1) | 4(1)  | -4(1)  | 4(1)   |
| C(16) | 36(1) | 52(1) | 51(1) | 2(1)  | -11(1) | 3(1)   |

The anisotropic displacement factor exponent takes the form  
 $2\pi^2 [h^2a^2U(11) + \dots + 2hka^*b^*U(12)]$

Table 5. Hydrogen Coordinates ( $\text{\AA} \times 10^4$ ) and equivalent isotropic displacement parameters ( $\text{\AA}^2 \times 10^3$ ) for irg05007

| atom   | x     | y          | z     | U(eq) |
|--------|-------|------------|-------|-------|
| H(1A)  | 242   | -2433      | 1094  | 39    |
| H(1B)  | -36   | -3119      | 1870  | 39    |
| H(2)   | -278  | -177       | 1304  | 34    |
| H(3)   | -1000 | 6.0000     | 2259  | 34    |
| H(4A)  | 929   | -2885      | 2290  | 38    |
| H(4B)  | 1076  | -1562.9999 | 1698  | 38    |
| H(5A)  | 1049  | 4267       | 1517  | 34    |
| H(5B)  | 731   | 4290       | 2348  | 34    |
| H(6A)  | 1449  | 2448       | 2793  | 37    |
| H(6B)  | 1779  | 2518       | 1969  | 37    |
| H(7A)  | 1703  | 5004       | 3005  | 47    |
| H(7B)  | 2052  | 5030       | 2193  | 47    |
| H(8A)  | 2426  | 3251       | 3492  | 75    |
| H(8B)  | 2764  | 4745       | 3224  | 75    |
| H(8C)  | 2777  | 3297       | 2681  | 75    |
| H(9A)  | 1205  | 675        | 1158  | 34    |
| H(9B)  | 603   | 487        | 635   | 34    |
| H(10A) | 836   | 2579       | -89   | 40    |
| H(10B) | 1386  | 3019       | 493   | 40    |
| H(11A) | 1385  | 419        | -473  | 42    |
| H(11B) | 1932  | 850        | 113   | 42    |
| H(12A) | 1592  | 2513       | -1242 | 72    |
| H(12B) | 2214  | 1583       | -1132 | 72    |
| H(12C) | 2106  | 3066       | -635  | 72    |
| H(13A) | -266  | 4151       | 1420  | 35    |
| H(13B) | 137   | 3861       | 668   | 35    |
| H(14A) | -889  | 2049       | 1071  | 34    |
| H(14B) | -502  | 1878       | 293   | 34    |
| H(15A) | -1206 | 4477       | 658   | 42    |
| H(15B) | -837  | 4252       | -130  | 42    |
| H(16A) | -1516 | 2309       | -497  | 70    |
| H(16B) | -1887 | 3822       | -354  | 70    |
| H(16C) | -1885 | 2538       | 291   | 70    |
